# Supplementary material
Source: ML conference proceedings conference paper supplement (https://proceedings.neurips.cc/paper_files/paper/2018/hash/fc49306d97602c8ed1be1dfbf0835ead-Abstract.html)
Supplement: Supplementary file [file fc49306d97602c8ed1be1dfbf0835ead-Supplemental.zip]

---

# Non-Local Recurrent Network for Image Restoration

## Supplementary Material

---

Ding Liu<sup>1</sup>, Bihan Wen<sup>1</sup>, Yuchen Fan<sup>1</sup>, Chen Change Loy<sup>2</sup>, Thomas S. Huang<sup>1</sup>

<sup>1</sup>University of Illinois at Urbana-Champaign <sup>2</sup>Nanyang Technological University  
{dingliu2, bwen3, yuchenf4, t-huang1}@illinois.edu ccloy@ntu.edu.sg

### 1 Overview

In this supplementary document, we present additional results to complement the paper. First, we present an extension of our general framework to other classic non-local methods for image restoration. Second, we provide visual results for the comparison of our NLRN and several competing methods on image denoising and image super-resolution.

### 2 Extension of the General Framework to Other Classic Non-Local Methods

Besides the extension to WNNM and non-local means, which are discussed in Section 3.2 of the main paper, we show the proposed non-local framework can be extended to collaborative filtering methods, *e.g.*, BM3D algorithm [1], as well as joint sparsity based methods, *e.g.*, LSSC algorithm [6]. We follow the same notations in Section 3.2 of the main paper. Both BM3D and LSSC apply block matching (BM) first before processing, and form  $N$  groups of similar patches into data matrices. The index set of the matched patches for the  $i$ -th reference patch is denoted as  $\mathbb{C}_i$ . The group of matched patches for the  $i$ -th reference patch is denoted as  $\mathbf{X}_{\mathbb{C}_i}$ .

Similar to WNNM [3], BM3D [1] also applies BM first to group similar patches based on their Euclidean distances. The matched patches are then processed via Wiener filtering [1], and the denoised results of the  $i$ -th group of patches are

$$\mathbf{Z}_{\mathbb{C}_i} = \tau^{-1}(\text{diag}(\omega)\tau(\mathbf{X}_{\mathbb{C}_i})). \quad (1)$$

Here  $\tau(\cdot)$  and  $\tau^{-1}(\cdot)$  denote the forward and backward Wiener filtering applied to the groups of matched patches, respectively. The diagonal matrix  $\text{diag}(\omega)$  is formed by the empirical Wiener coefficients  $\omega$ . BM3D applies data pre-cleaning, using discrete cosine transform (DCT), to estimate the original patch, and calculate the estimate of  $\omega$  [1]. Since calculating  $\mathbf{Z}_{\mathbb{C}_i}$  in (1) involves only linear filtering, it can also be generalized using the proposed non-local framework. Unlike the extension to WNNM, here  $\sum_{j \in \mathbb{C}_i} \Phi(\mathbf{X})_i^j \mathbf{G}(\mathbf{X})_j$  corresponds to the denoised results via Wiener filtering as shown in (1), of the  $i$ -th group of matched patches.

Different from BM3D and WNNM, LSSC learns a common dictionary  $\mathbf{D}$  for all image patches, and imposes joint sparsity [6] on each data matrix of matched patches  $\mathbf{X}_{\mathbb{C}_i}$ , so that the correlation of the matched patches are exploited by enforcing the same support of their sparse codes. Thus, the joint sparse coding in LSSC [6] becomes

$$\hat{\mathbf{A}}_i = \underset{\mathbf{A}_i}{\text{argmin}} \|\mathbf{A}_i\|_{0,\infty} \quad s.t. \quad \left\| \mathbf{X}_{\mathbb{C}_i}^T - \mathbf{D}\mathbf{A}_i \right\|_F^2 \leq \epsilon |\mathbb{C}_i|, \quad \forall i, \quad (2)$$

where the  $(0, \infty)$  “norm”  $\|\cdot\|_{0,\infty}$  counts the number of non-zero columns of each sparse code matrix  $\mathbf{A}_i$  [6], and  $|\mathbb{C}_i|$  is the cardinality of  $\mathbb{C}_i$ . The coefficient  $\epsilon$  is a constant, which is used to upper bound the sparse modeling errors. In general, the solution to (2) is NP-hard. To simplify the discussion, we assume the dictionary to be unitary (which reduces the sparse coding problem to the transform-model

sparse coding [10]), *i.e.*,  $\mathbf{D}^T \mathbf{D} = \mathbf{I}$  and  $\mathbf{D} \in \mathbb{R}^{k \times k}$ . Thus there exists a corresponding shrinkage function  $\eta(\cdot)$  for imposing joint sparsity on the sparse codes [6, 7], such that the denoised estimates of the  $i$ -th patch group can be obtained as  $\mathbf{Z}_{\mathbb{C}_i} = \hat{\mathbf{A}}_i^T \mathbf{D}^T = \eta(\mathbf{X}_{\mathbb{C}_i} \mathbf{D}) \mathbf{D}^T$ . Though joint sparse coding projects all data onto a union of subspaces [6, 2, 10] which is a non-linear operation in general, each data matrix  $\mathbf{X}_{\mathbb{C}_i}$  is projected onto one particular subspace spanned by the selected atoms corresponding to the non-zero columns in  $\hat{\mathbf{A}}_i$ , which is locally linear. For the  $i$ -th group of patches, such a subspace projection corresponds to  $\sum_{j \in \mathbb{C}_i} \Phi(\mathbf{X})_i^j \mathbf{G}(\mathbf{X})_j$  in the proposed general framework.

### 3 Visual Results

We show the visual comparison of our NLRN and several competing methods: BM3D [1], WNNM [3], and MemNet [9] for image denoising in Figure 1. Our method can recover more details from the noisy measurement. The visual comparison of our NLRN and several recent methods: DRCN [4], LapSRN [5], DRRN [8], and MemNet [9] for image super-resolution is displayed in Figure 2. Our method is able to reconstruct sharper edges and produce fewer artifacts especially in the regions of repetitive patterns.

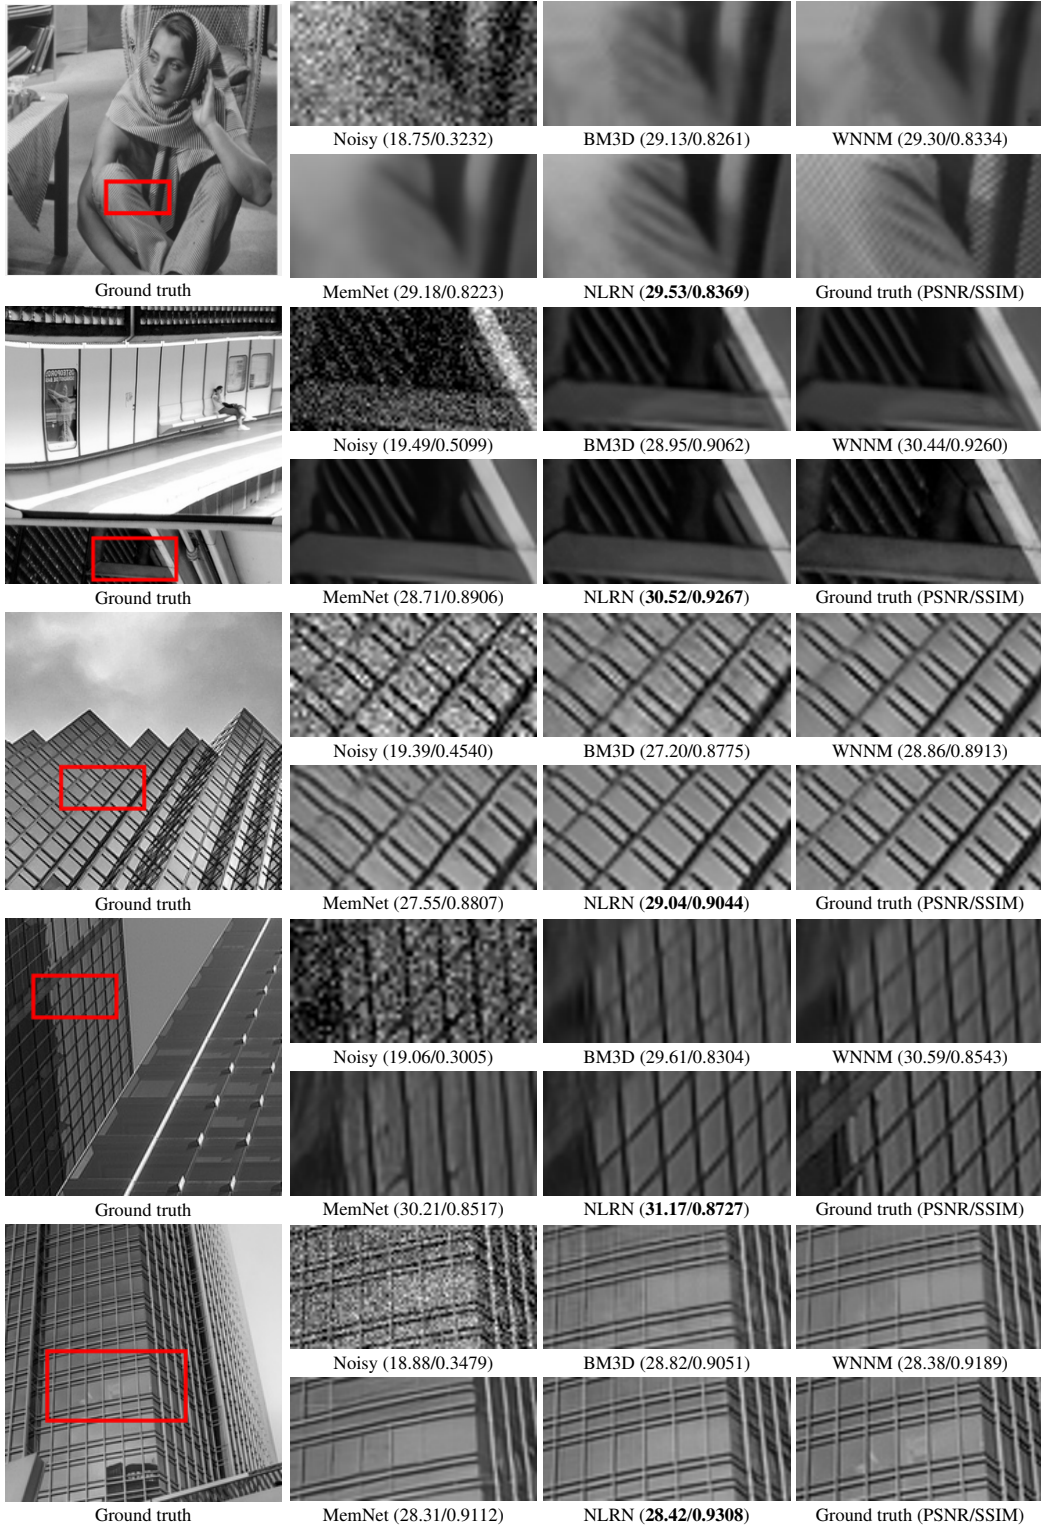

**Figure 1:** Qualitative comparison of image denoising results with noise level of 30. The zoom-in region in the red bounding box is shown on the right. From top to bottom: 1) the image *barbara*. 2) image *004* in Urban100. 3) image *019* in Urban100. 4) image *033* in Urban100. 5) image *046* in Urban100.

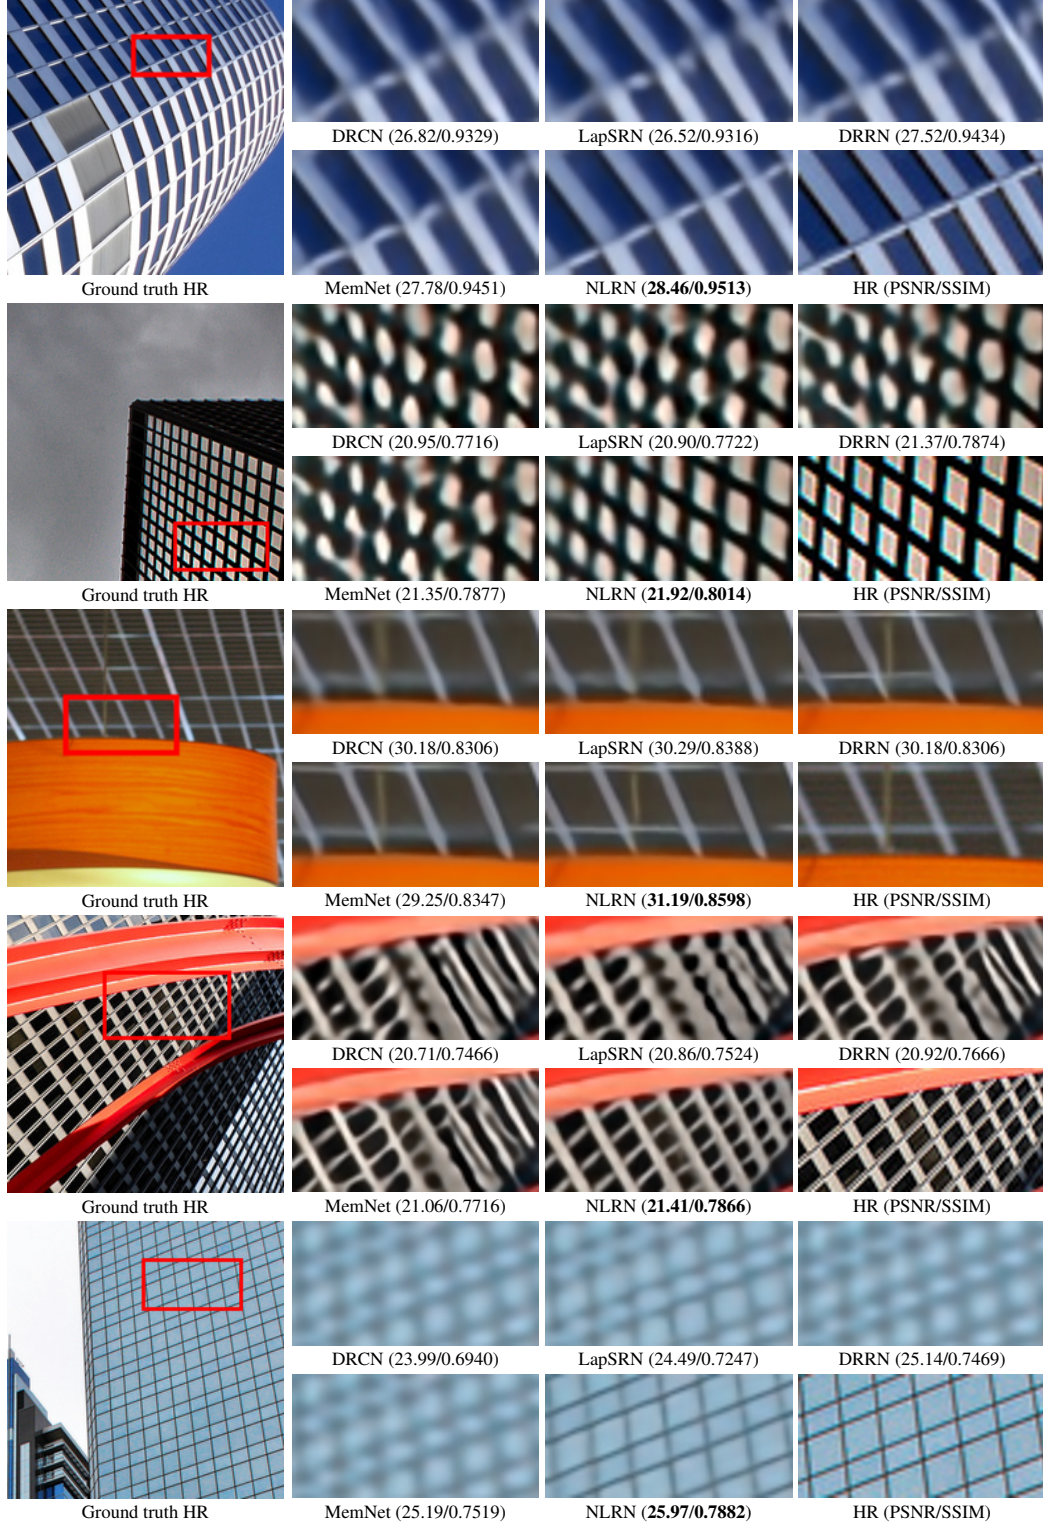

**Figure 2:** Qualitative comparison of image super-resolution results with  $\times 4$  upscaling. The zoom-in region in the red bounding box is shown on the right. From top to bottom: 1) image 005 in Urban100. 2) image 019 in Urban100. 3) image 044 in Urban100. 4) image 062 in Urban100. 5) image 099 in Urban100.

## References

- [1] K. Dabov, A. Foi, V. Katkovnik, and K. Egiazarian. Image denoising by sparse 3-d transform-domain collaborative filtering. *IEEE TIP*, 2007.

- [2] M. Elad and M. Aharon. Image denoising via sparse and redundant representations over learned dictionaries. *IEEE TIP*, 2006.
- [3] S. Gu, L. Zhang, W. Zuo, and X. Feng. Weighted nuclear norm minimization with application to image denoising. In *CVPR*, pages 2862–2869, 2014.
- [4] J. Kim, J. Kwon Lee, and K. Mu Lee. Deeply-recursive convolutional network for image super-resolution. In *CVPR*, 2016.
- [5] W.-S. Lai, J.-B. Huang, N. Ahuja, and M.-H. Yang. Deep laplacian pyramid networks for fast and accurate super-resolution. In *CVPR*, 2017.
- [6] J. Mairal, F. Bach, J. Ponce, G. Sapiro, and A. Zisserman. Non-local sparse models for image restoration. In *ICCV*, 2009.
- [7] U. Schmidt and S. Roth. Shrinkage fields for effective image restoration. In *CVPR*, 2014.
- [8] Y. Tai, J. Yang, and X. Liu. Image super-resolution via deep recursive residual network. In *CVPR*, 2017.
- [9] Y. Tai, J. Yang, X. Liu, and C. Xu. Memnet: A persistent memory network for image restoration. In *ICCV*, 2017.
- [10] B. Wen, S. Ravishankar, and Y. Bresler. Structured overcomplete sparsifying transform learning with convergence guarantees and applications. *IJCV*, 2015.
